# Supplementary material for: Degradation of Aflatoxin B1 and Zearalenone by Bacterial and Fungal Laccases in Presence of Structurally Defined Chemicals and Complex Natural Mediators
Source: Toxins (Basel). 2019 Oct 22;11(10):609. doi: 10.3390/toxins11100609 (PMC6832423; doi:10.3390/toxins11100609)
Supplement: Supplementary file 1 [file toxins-11-00609-s001.pdf]

## Supplementary Materials: Degradation of Aflatoxin B<sub>1</sub> and Zearalenone by Bacterial and Fungal Laccases in Presence of Structurally Defined Chemicals and Complex Natural Mediators

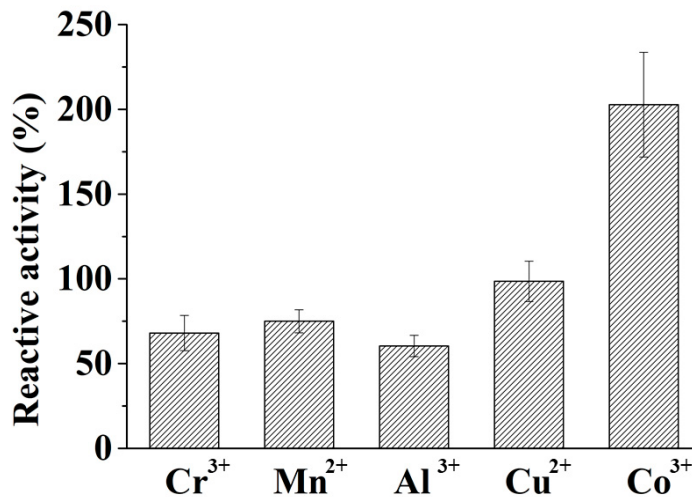

Figure S1. Activity of BsCotA in the presence of metal ions.
